# Supplementary material for: Next generation sequencing identifies novel disease-associated BEST1 mutations in Bestrophinopathy patients
Source: PubMed Central journal article supplement (PMC6033935; doi:10.1038/s41598-018-27951-8), 2018-07-05
Supplement: 41598_2018_27951_MOESM1_ESM.pdf [file 41598_2018_27951_MOESM1_ESM.pdf]

## Supplementary figures:

### Next generation sequencing identifies novel disease-associated BEST1 mutations in Bestrophinopathy patients

Thong T Nguyen<sup>2#</sup>, Poornachandra B<sup>4#</sup>, Anshuman Verma<sup>1</sup>, Ruchir A Mehta<sup>4</sup>, Sameer Phalke<sup>3</sup>, Rajani Battu<sup>4</sup>, Vedam L Ramprasad<sup>3</sup>, Andrew S. Peterson<sup>2\*</sup>, Arkasubhra Ghosh<sup>1\*</sup>, Somasekar Seshagiri<sup>2\*</sup>

<sup>1</sup>GROW Research Laboratory, Narayana Nethralaya Foundation, Bangalore, IN.

<sup>2</sup>Department of Molecular Biology, Genentech Inc, USA.

<sup>3</sup>Medgenome Inc., Bangalore, IN

<sup>4</sup>Retina Department, Narayana Nethralaya, Bangalore, IN

# These authors contributed equally to the study.

**Short title:** Mutations in Best disease

**Key Words:** Retina, Bestrophin, Vitelliform macular degeneration, exome sequencing.

#### \*Corresponding authors:

Andrew Peterson, PhD

Department of Molecular Biology, Genentech Inc.,

1 DNA Way, South San Francisco, California 94080, USA.

Email: peterson.andrew@gene.com

Arkasubhra Ghosh, MSc, PhD

GROW Research Laboratory

Narayana Nethralaya Foundation, Narayana Health City,

# 258/A, Bommasandra, Hosur Road, Bangalore - 560 099 - INDIA.

Email: arkasubhra@narayananeethralaya.com

Sekar Seshagiri, PhD

Department of Molecular Biology, Genentech Inc.,

1 DNA Way, South San Francisco, California 94080, USA.

Email: sekar@gene.com

## **Supplementary Figure Legends:**

**Supplementary Figure S1:** FAMILY A. Sibling (II.2, a) OCT of the sibling showing cystoid (white Asterix) and schitic changes in inner and outer nuclear layers of retina. ERG of the proband (b, c) and sibling (II.2, d, e) showing rod cone dysfunction. EOG of the proband (f, g) and sibling (II.2, h, i) showing minimal light rise and no light rise, respectively.

**Supplementary Figure S2:** FAMILY B. (a, b) ERG showing rod cone dysfunction in proband. EOG (c, d) showed an absence of light peak in the proband.

**Supplementary Figure S3:** Family C. (a-c) OCT showing hyper reflective RPE cell Layer (Black Arrow) with a serous subretinal fluid (White Asterix) with focal schitic changes (White Arrow) in proband's affected brother (II.1, a), brother (II.4, b) and sister (II.2, c). (d-g) Proband's (II.3) ERG (d,e) was normal and EOG (f, g) showed absence of light rise.

**Supplementary Figure S4:** Family D. (a-b) OCT showing focal subretinal fluid (White Arrow) in the left eye of the proband's father (I.1, a) in family D. Sibling (II.2, b) OCT was normal. (c-f) Proband (II.1) ERG (c, d) and EOG (e, f) was abnormal.

**Supplementary Figure S5:** Exome sequencing depth and coverage across samples sequenced in the study.

**Supplementary Figure S6:** Kinship coefficients between the sequenced family members confirmed their relationship.

**Supplementary Figure S7:** Representative Sanger sequence chromatograms of members in family A showing BEST1 p.Tyr131Cys mutation.

**Supplementary Figure S8:** Representative Sanger sequence chromatograms of members in family B showing BEST1 p.Arg150Pro mutation.

**Supplementary Figure S9:** Representative Sanger sequence chromatograms of members in family C showing BEST1 p.Arg47His mutation.

**Supplementary Figure S10:** IGV visualization of reads spanning BEST1 p.Val216Ile mutation in members of family C.

**Supplementary Figure S11:** Representative Sanger sequence chromatograms of members in family D showing BEST1 p.Thr91Ile mutation.

# Supplementary Figure S1

## S1a

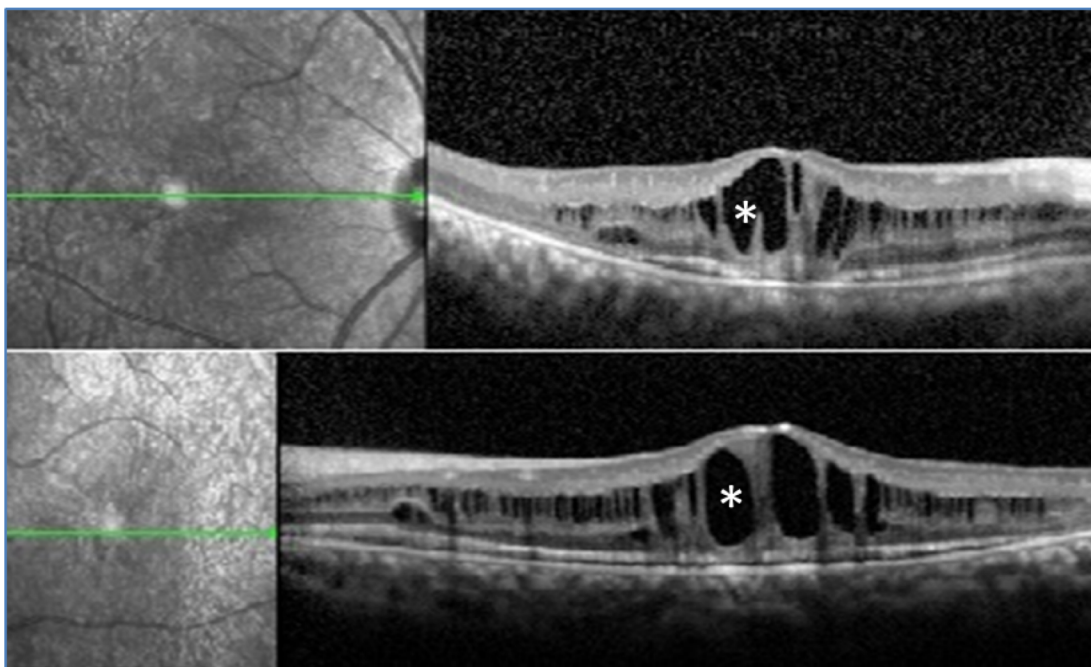

## S1b

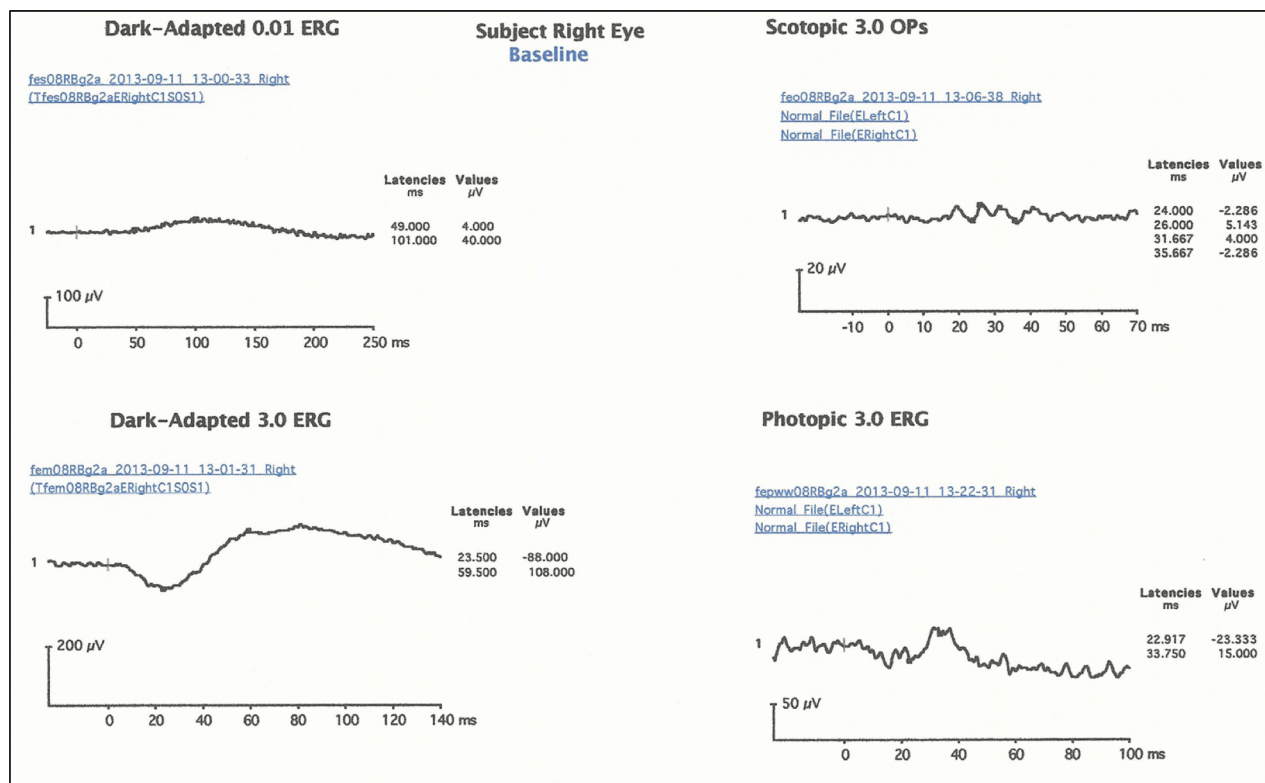

# S1c

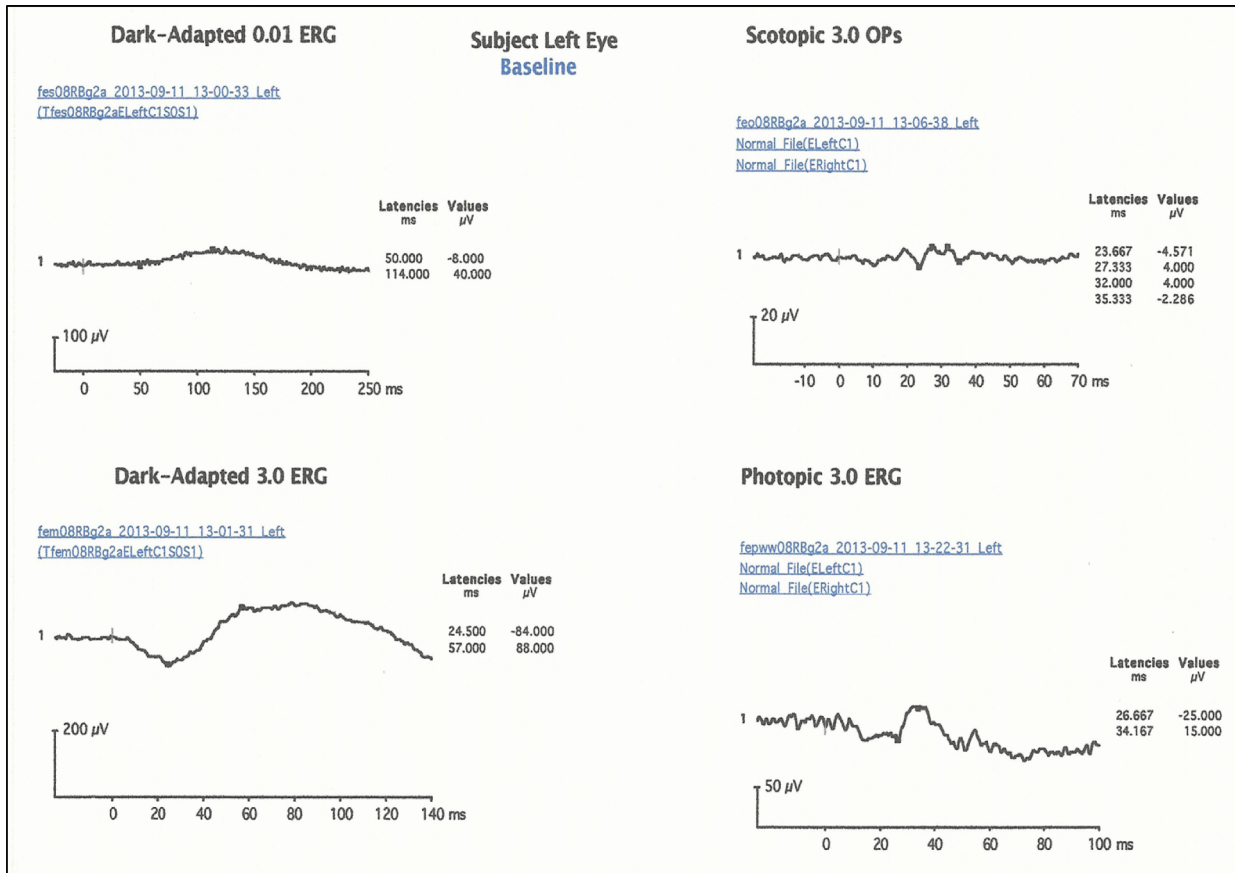

# S1d

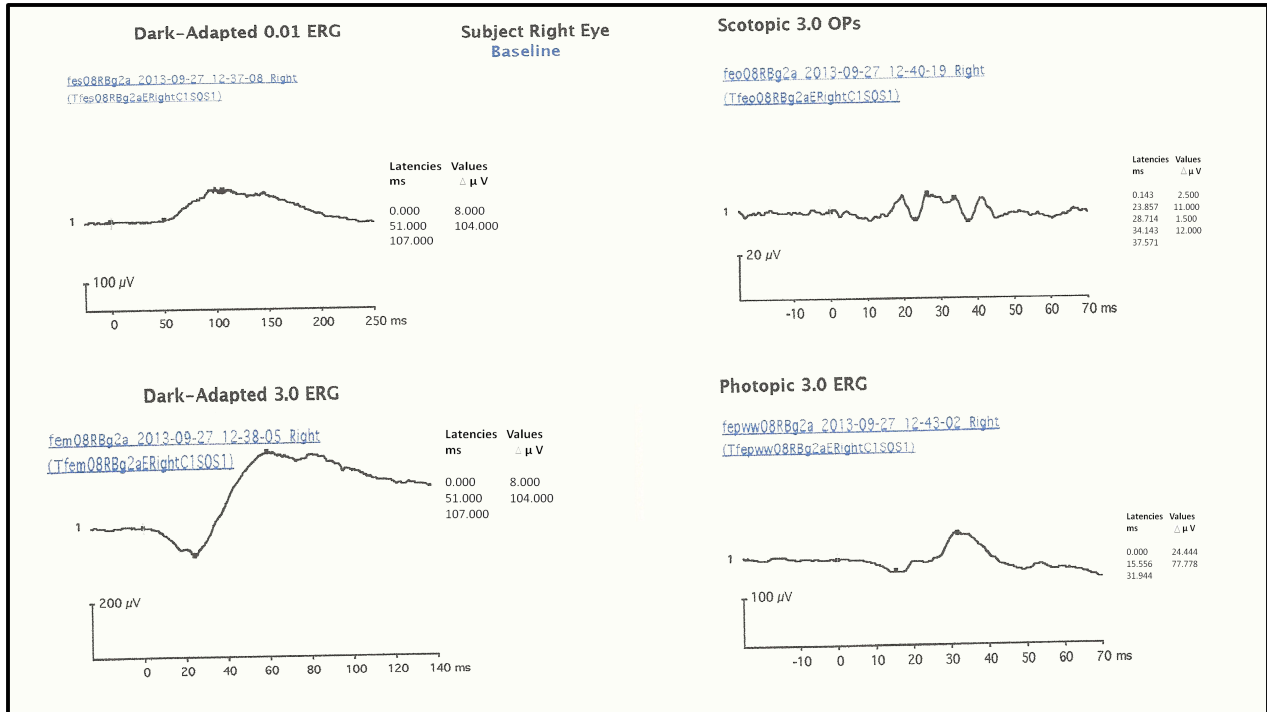

# S1e

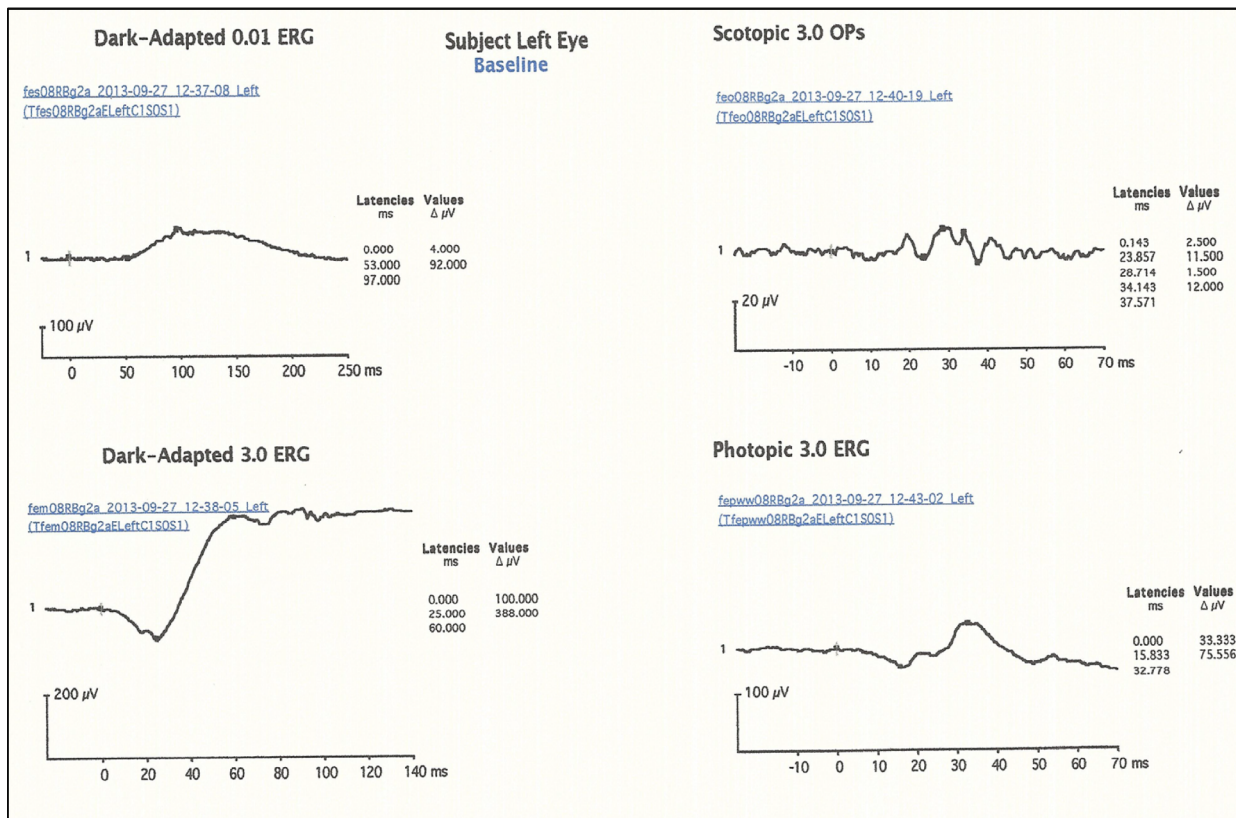

# S1f

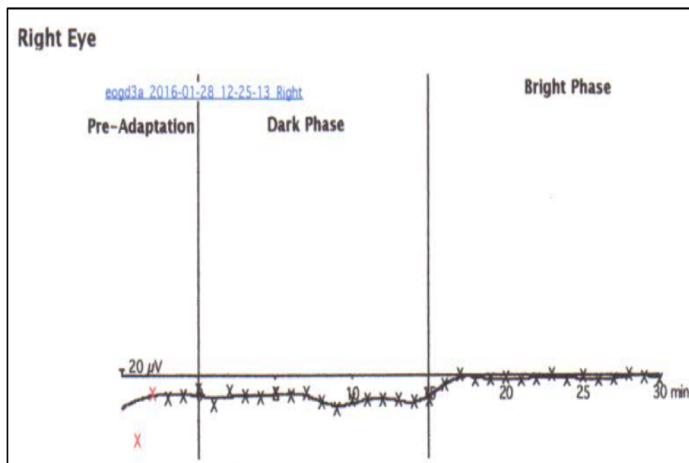

# S1g

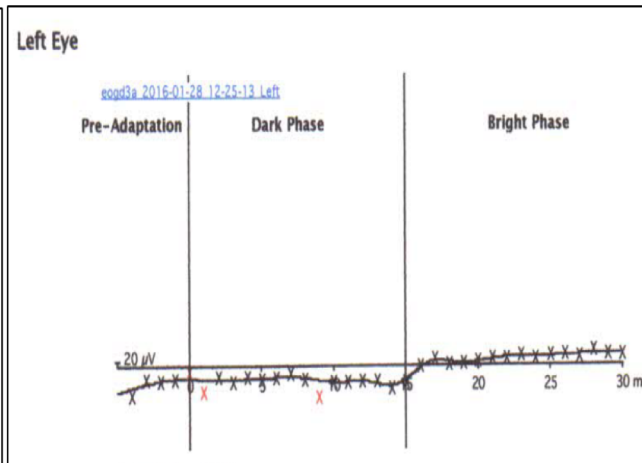

# S1h

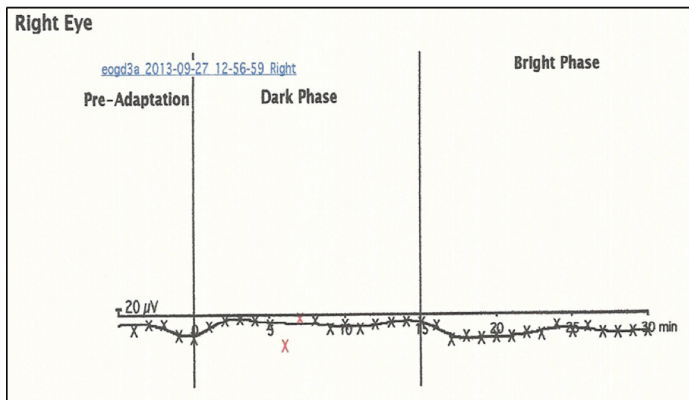

# S1i

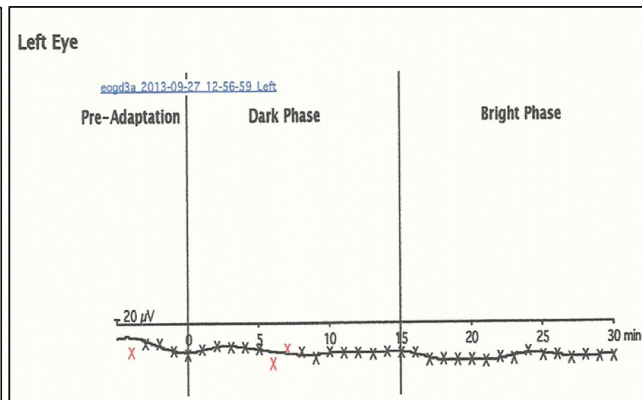

# Supplementary Figure S2

## S2a

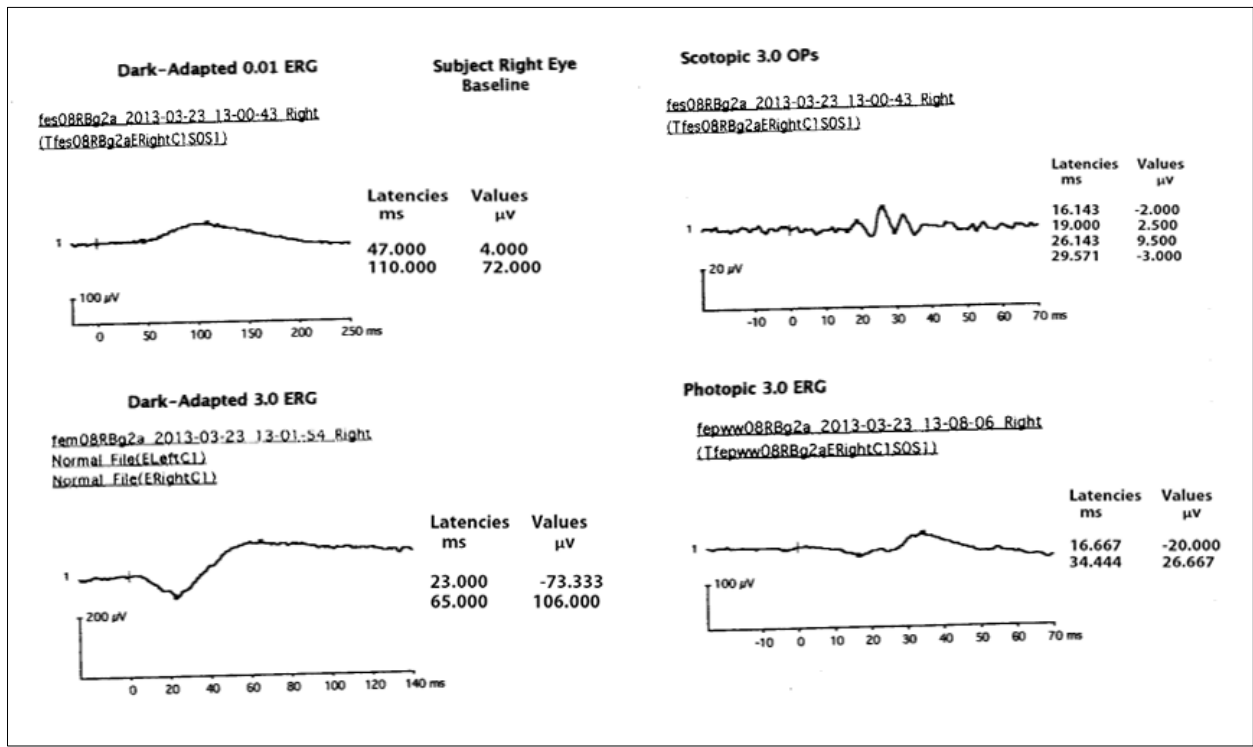

## S2b

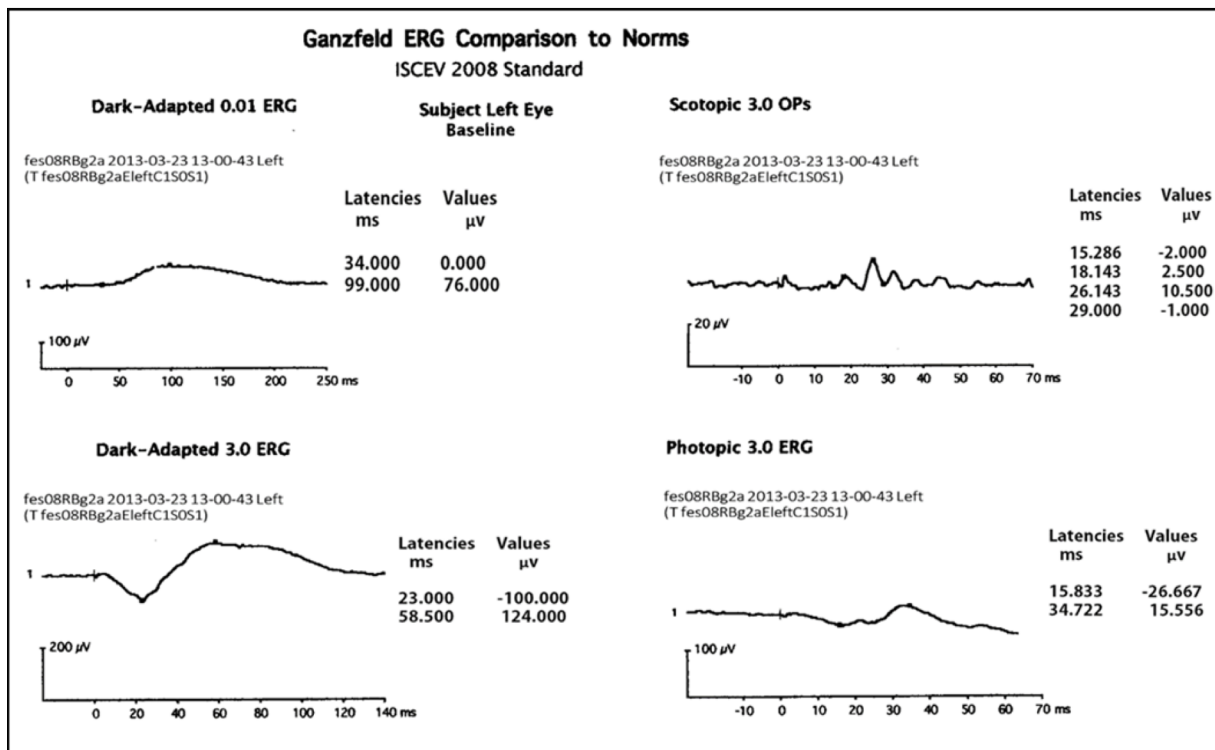



# Supplementary Figure S3

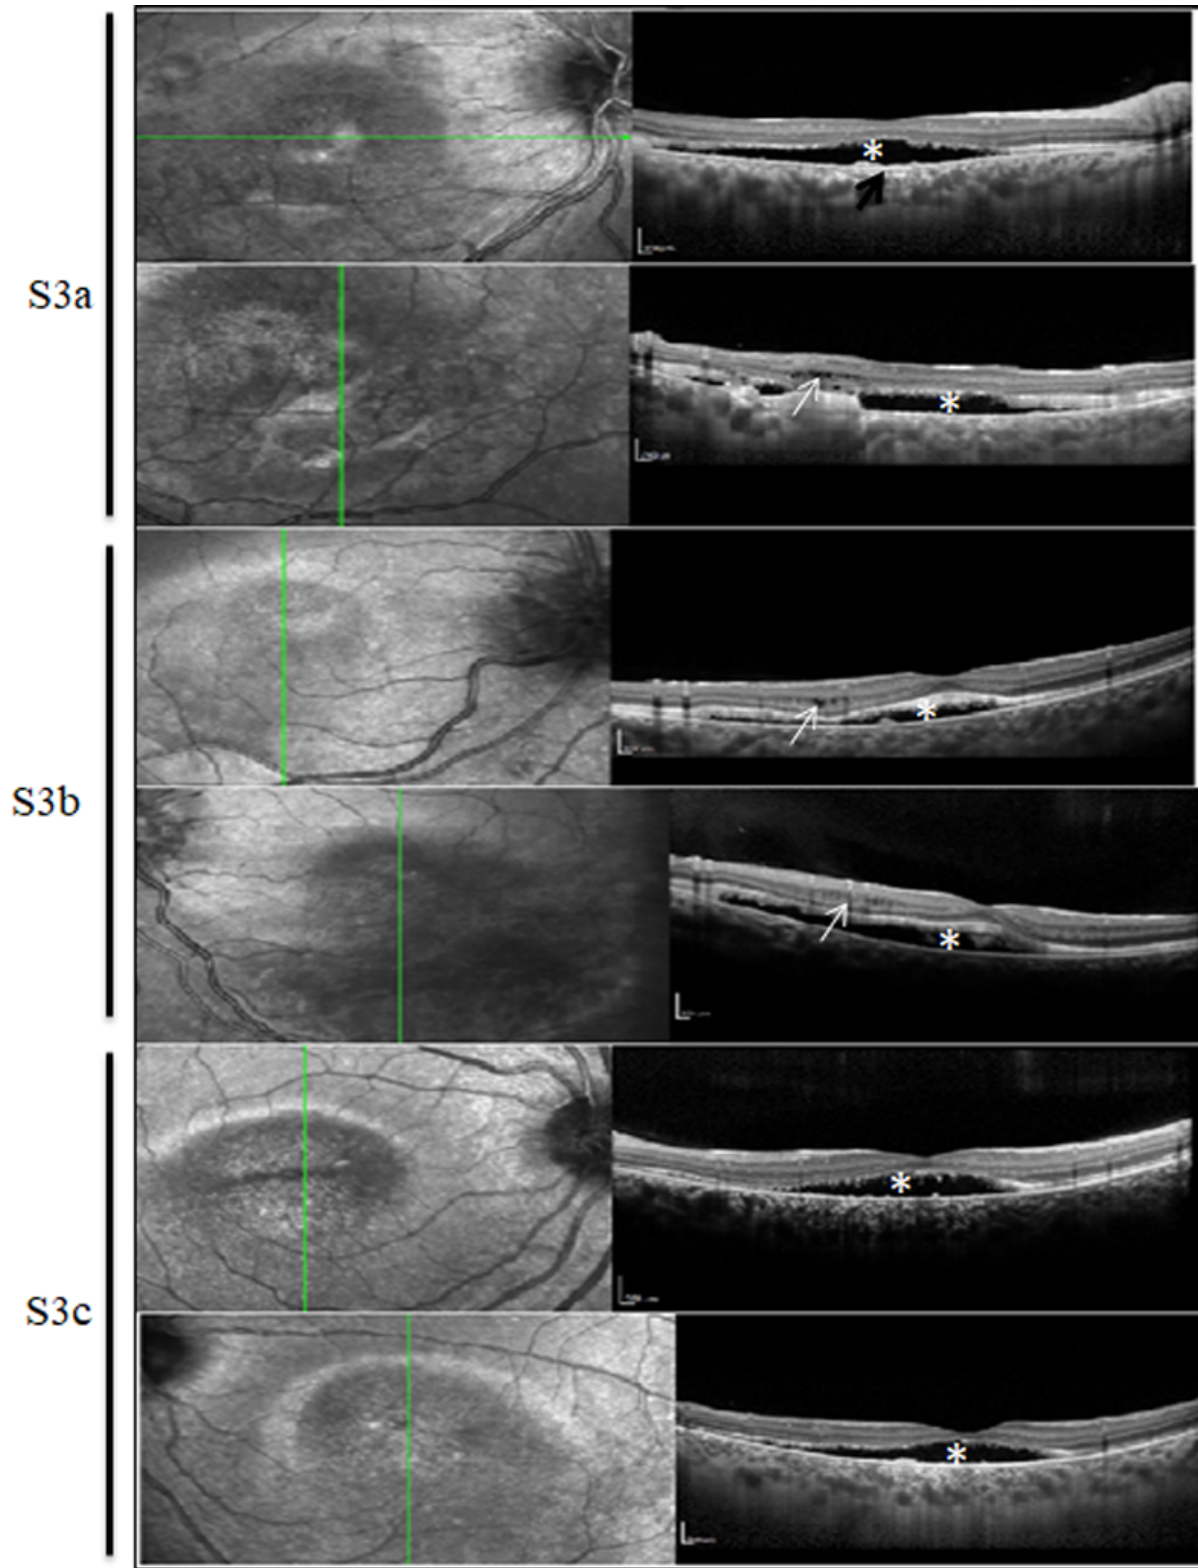



### S3d

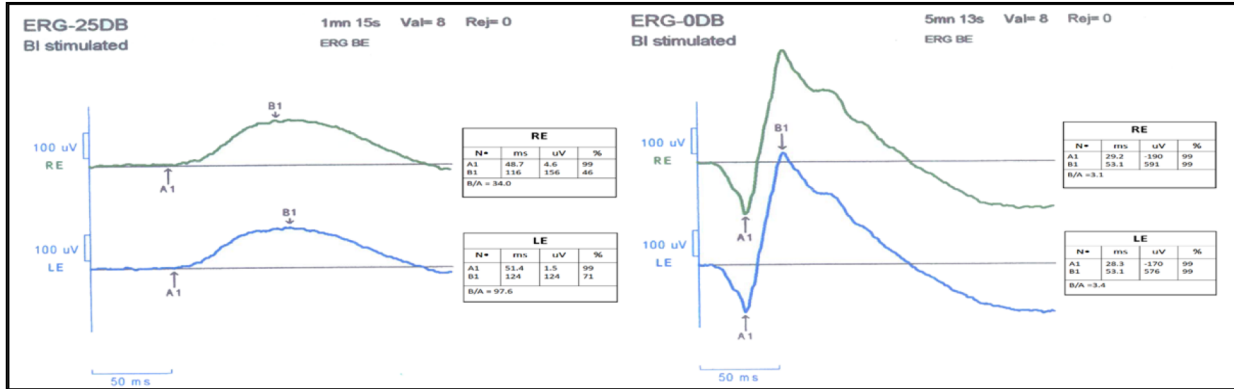

### S3e

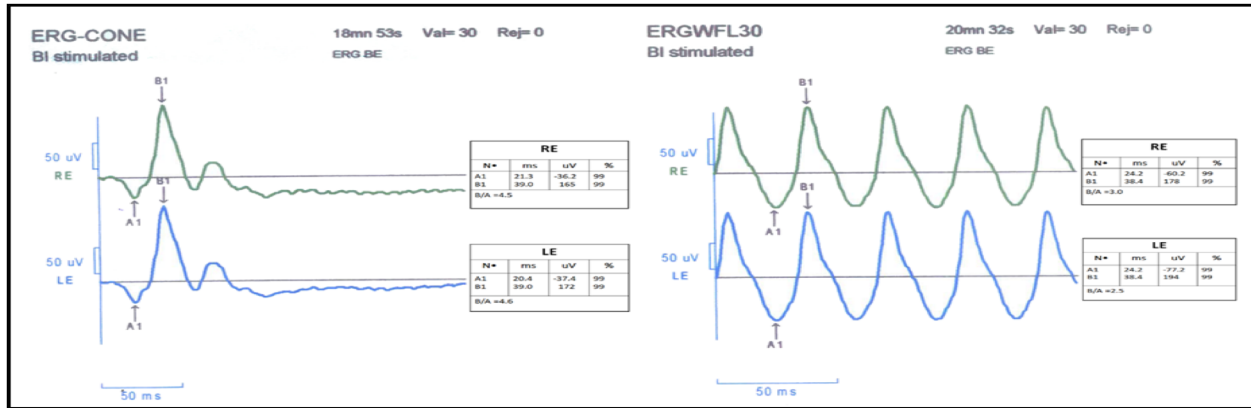

### S3f

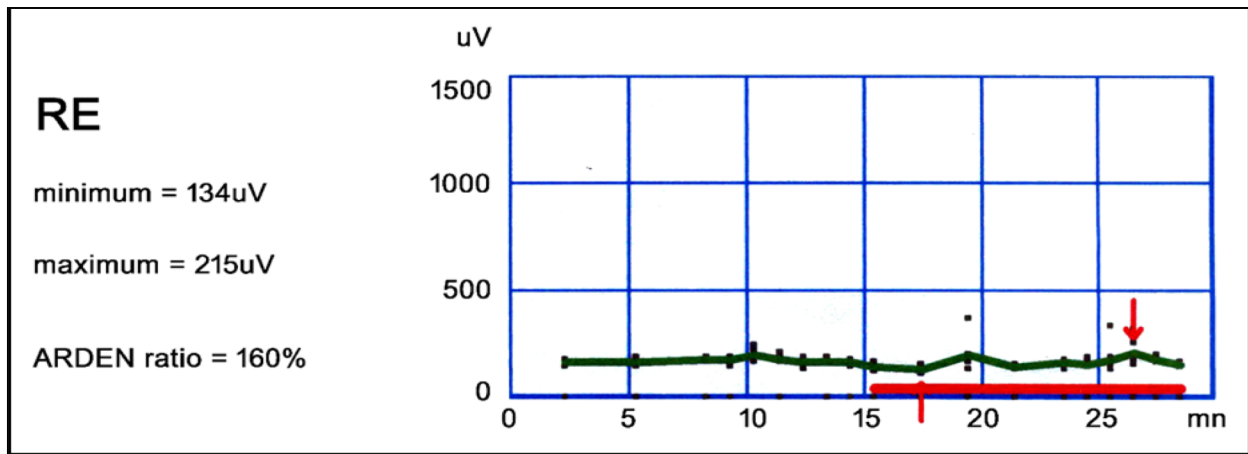

### S3g

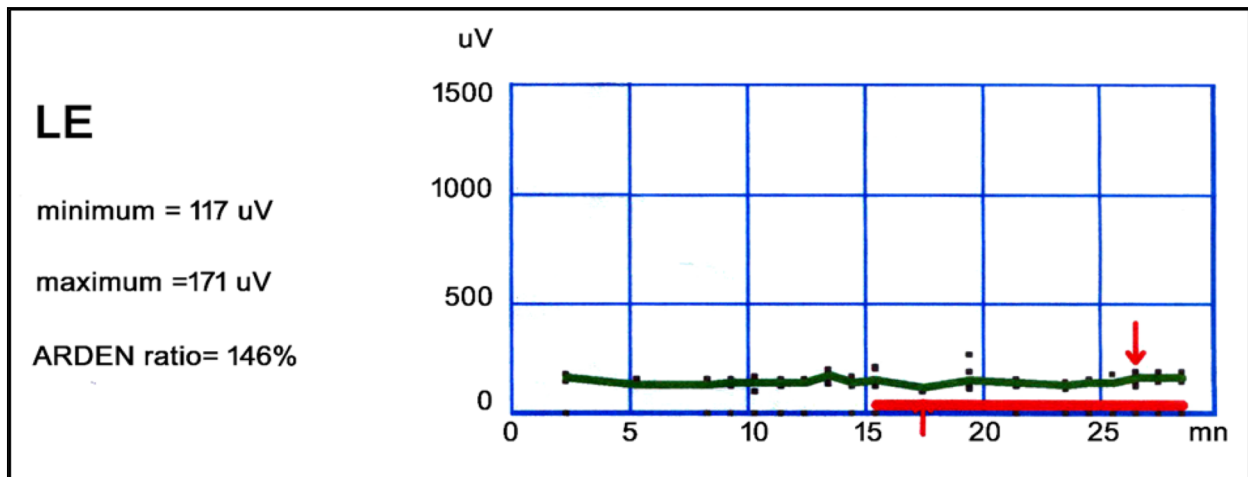

# Supplementary Figure S4

S4a

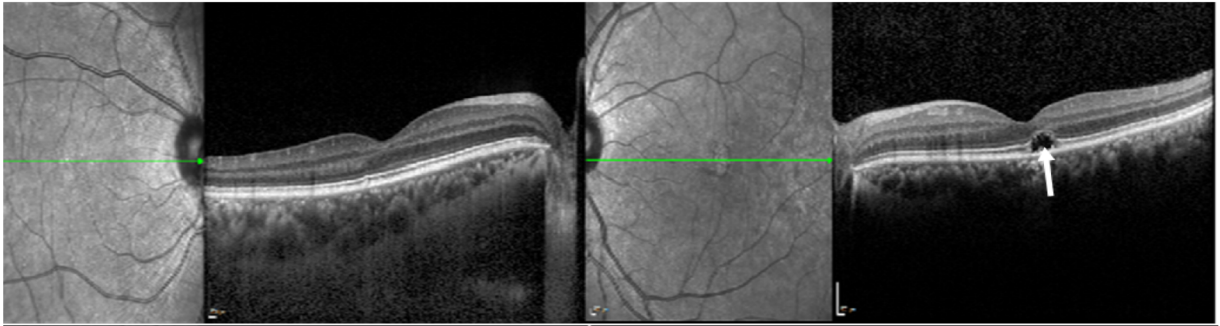

S4b

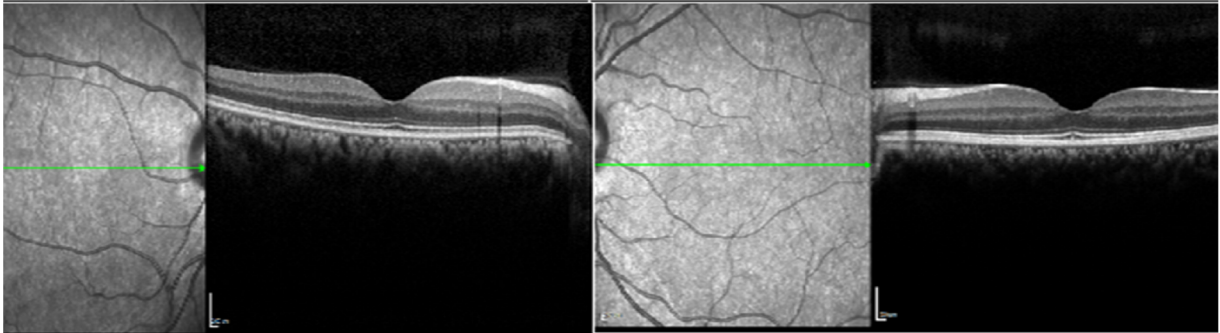

S4c

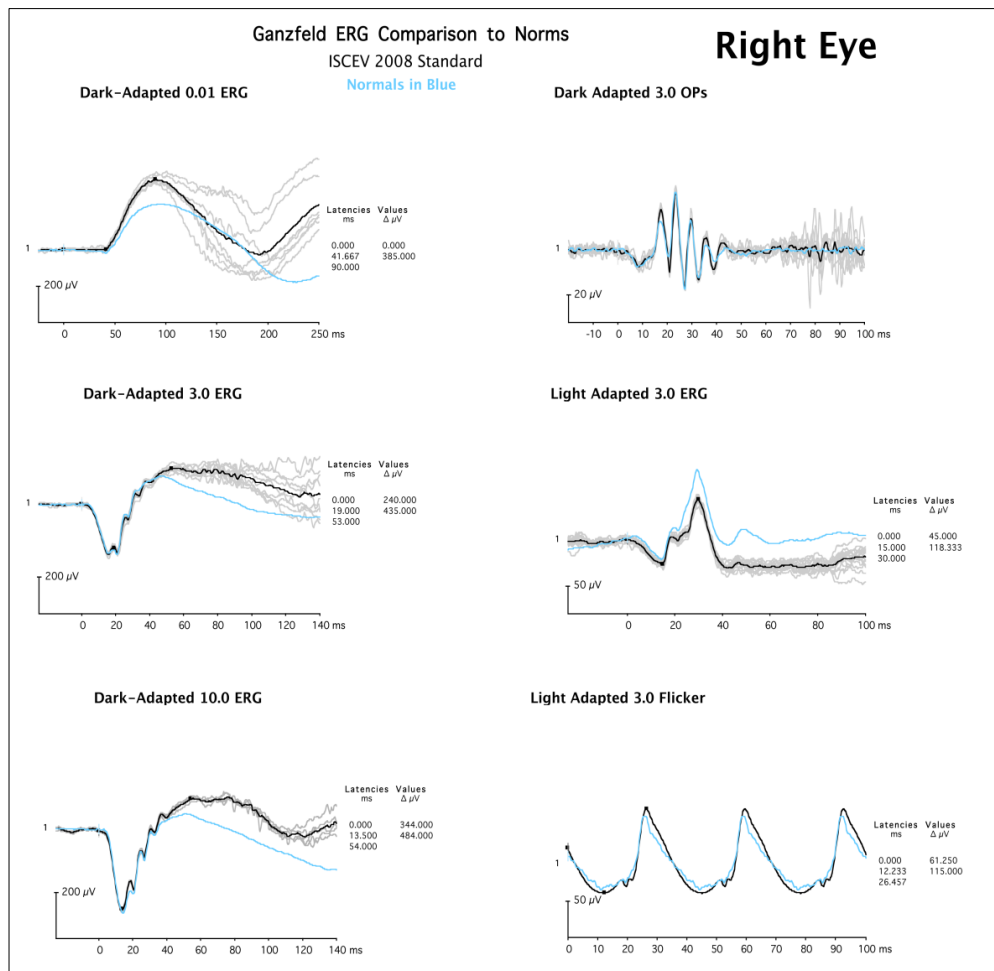

S4d

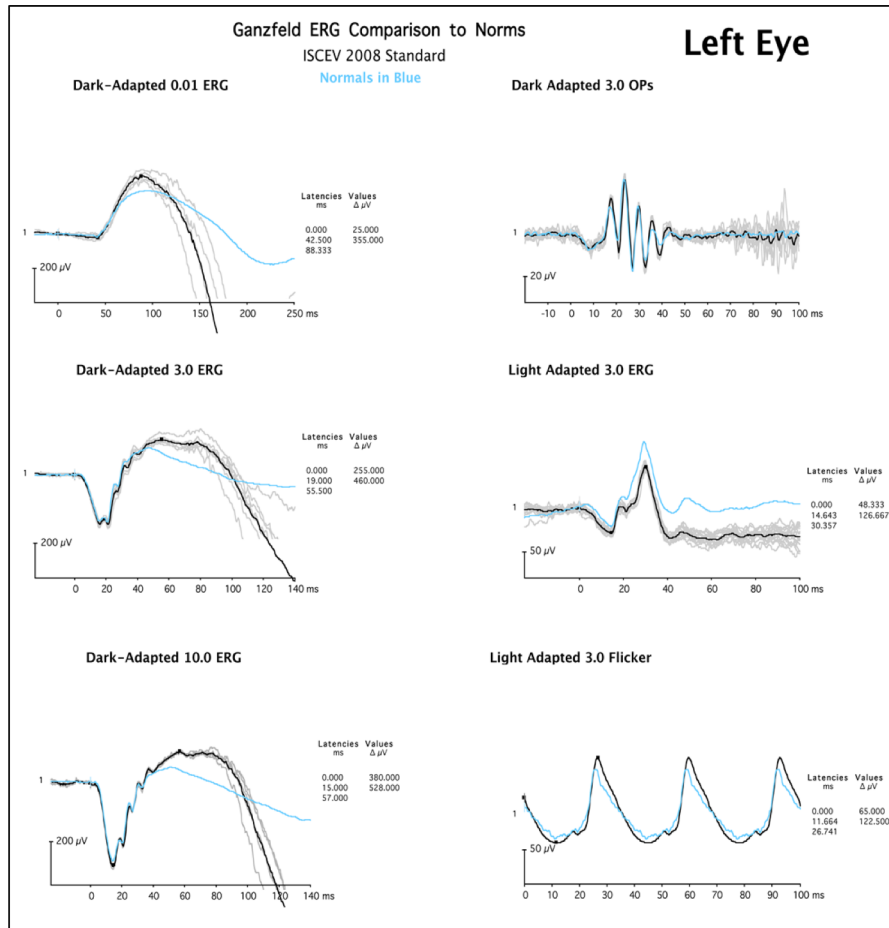

S4e

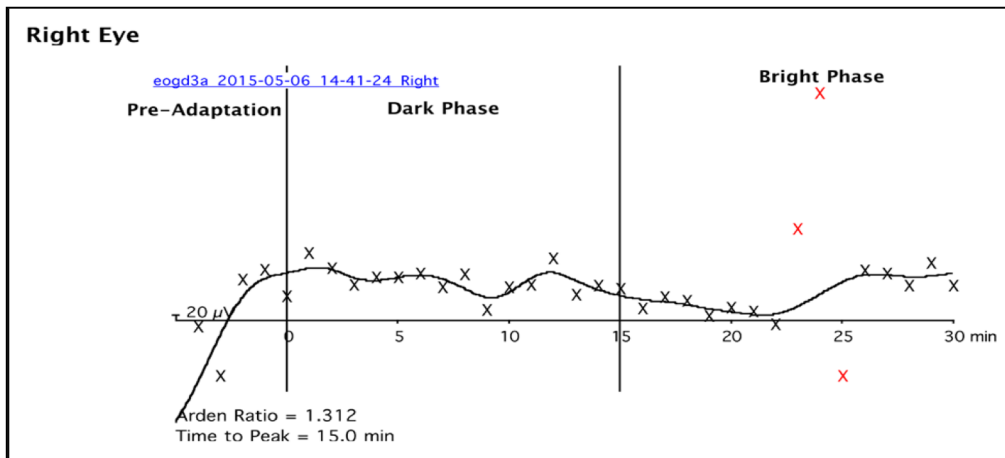

S4f

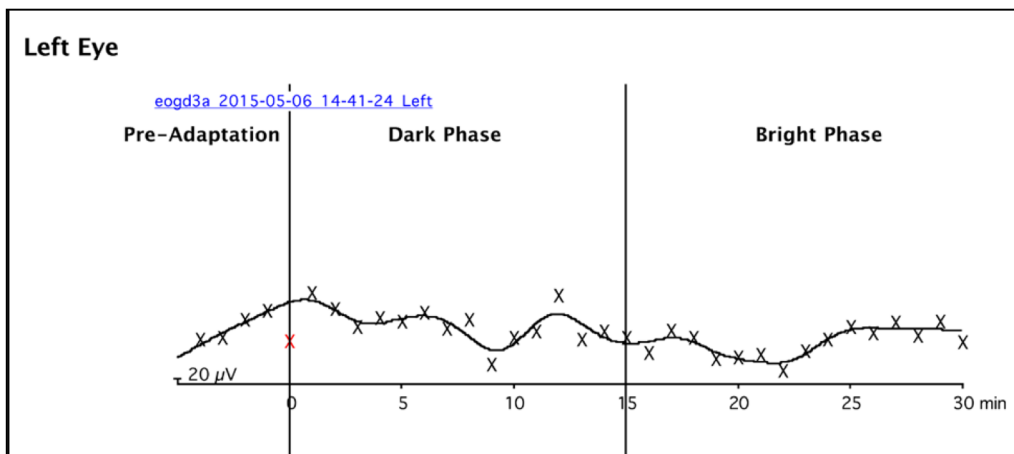

# Supplementary Figure S5

**Coverage summary**  
Average=71x, Range:45x-94x

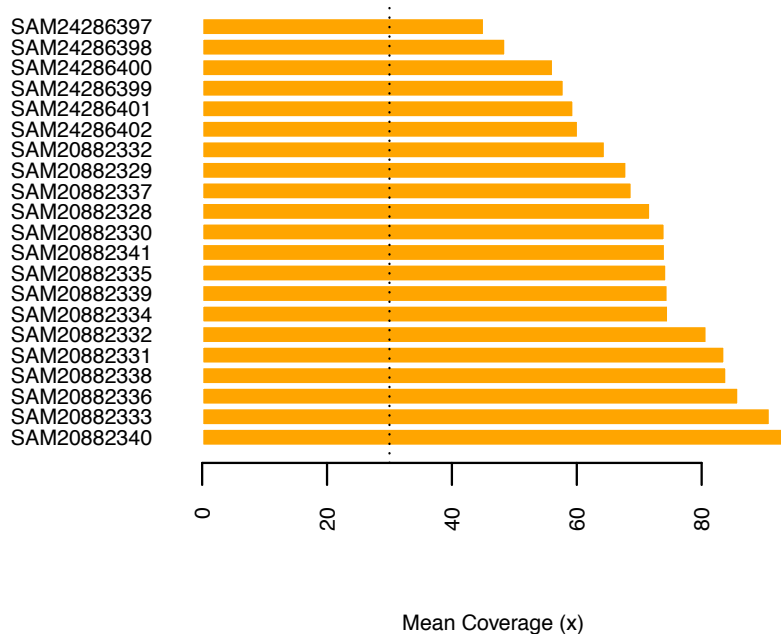

**Percent bases above 20x**  
Average=87%, Range: 76-91

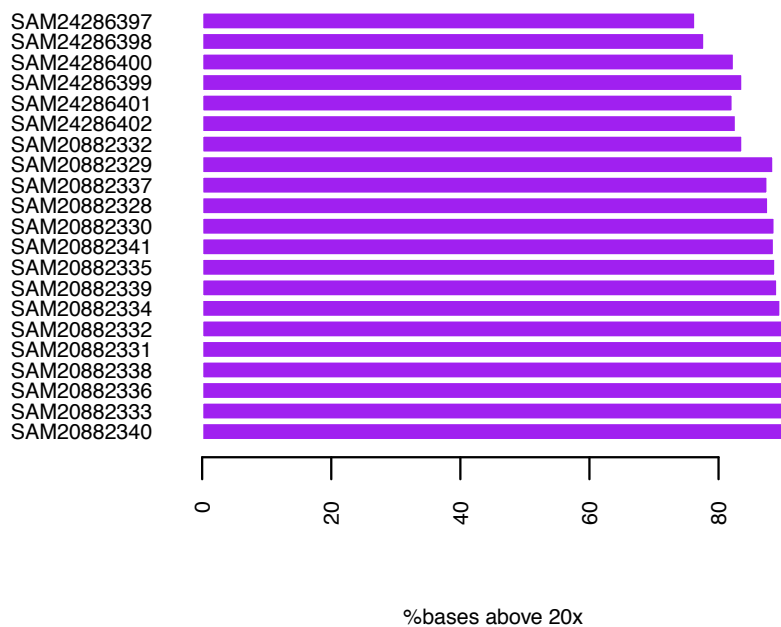

# Supplementary Figure S6

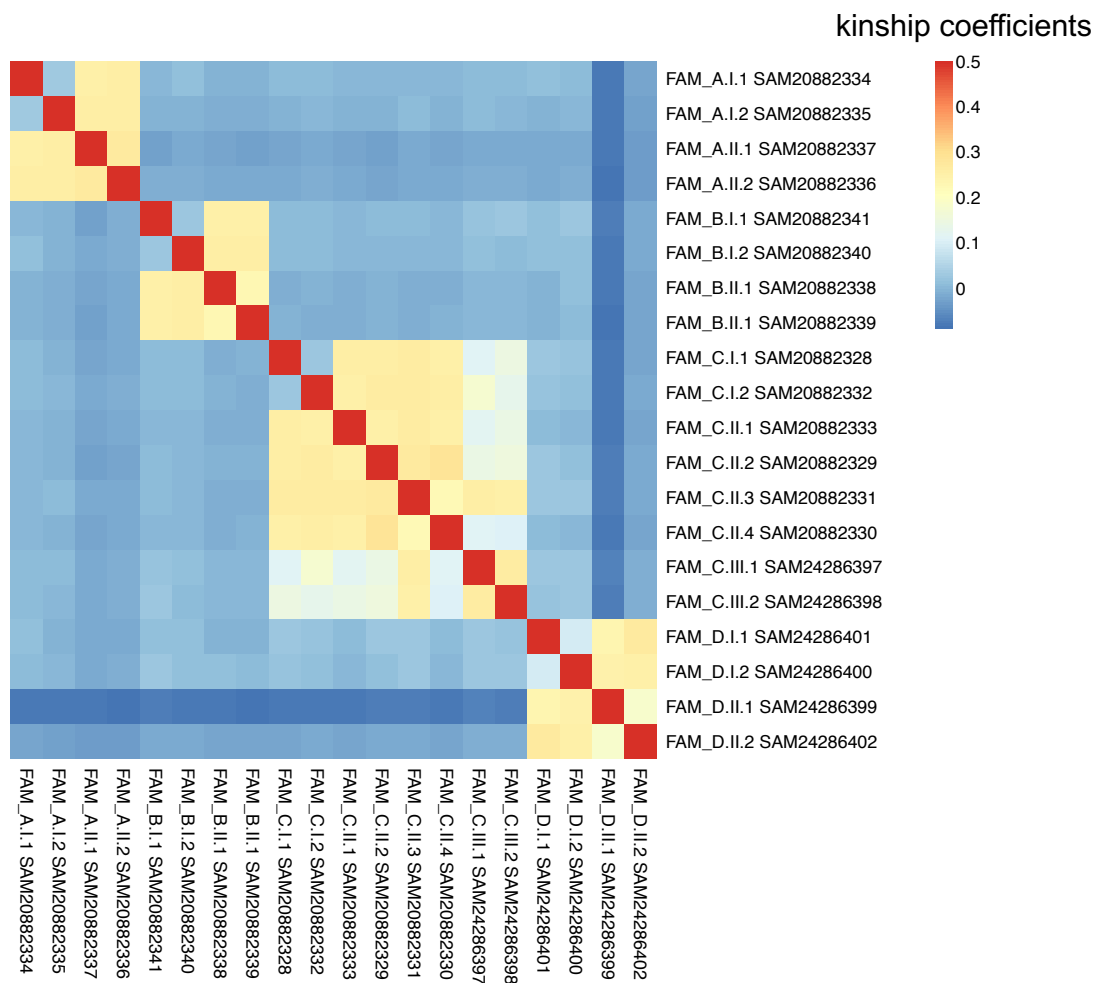

# Supplementary Figure S7

## Family A

GRCh37 Chr11; 61723334 A>G; p.Y131C

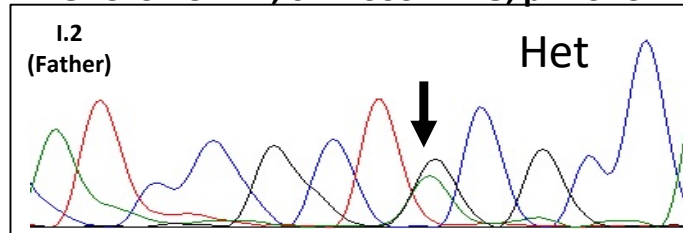

A T C C G C T **A/G** C G C C

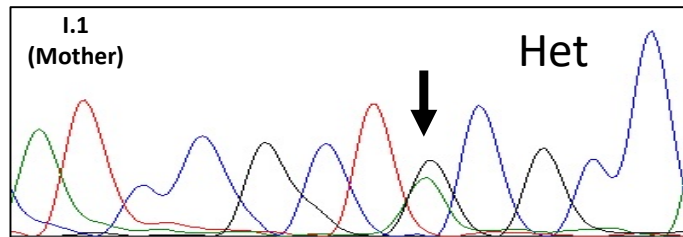

A T C C G C T **A/G** C G C C

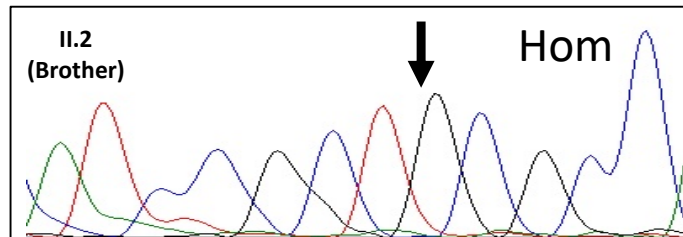

A T C C G C T **G** C G C C

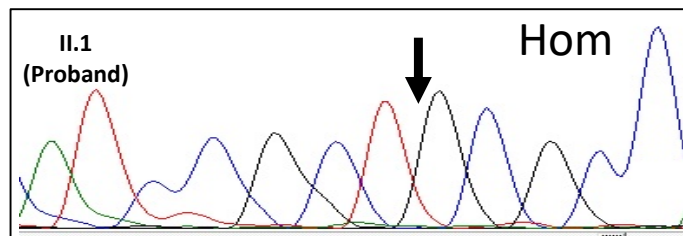

A T C C G C T **G** C G C C

# Supplementary Figure S8

## Family B

GRCh37 Chr11:61723391 G>C; p.R150P

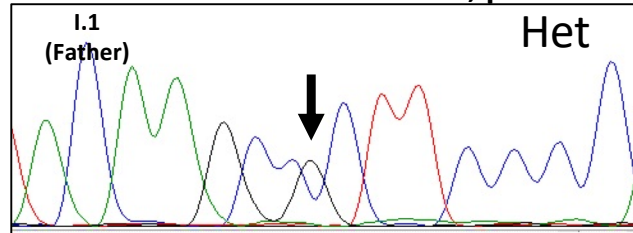

A C A A G C **G/C** C T T C C C C

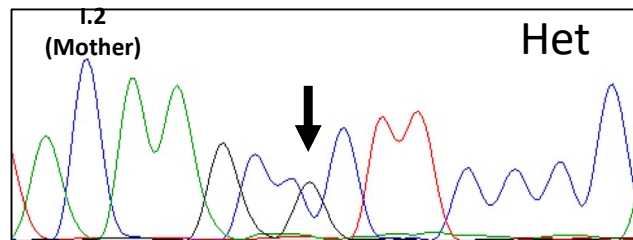

A C A A G C **G/C** C T T C C C C

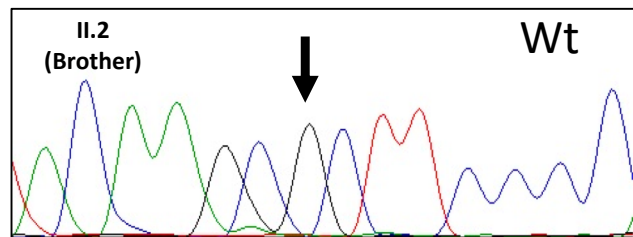

A C A A G C **G** C T T C C C C

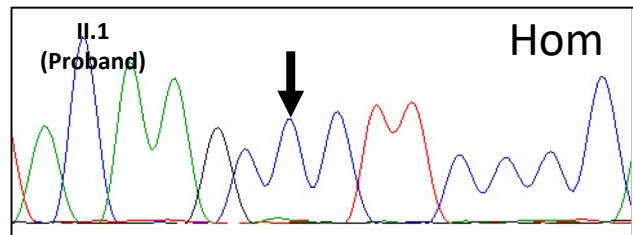

A C A A G C **C** C T T C C C C

# Supplementary Figure S9

## Family C

GRCh37 Chr11:61719418:G>A: p.R47H

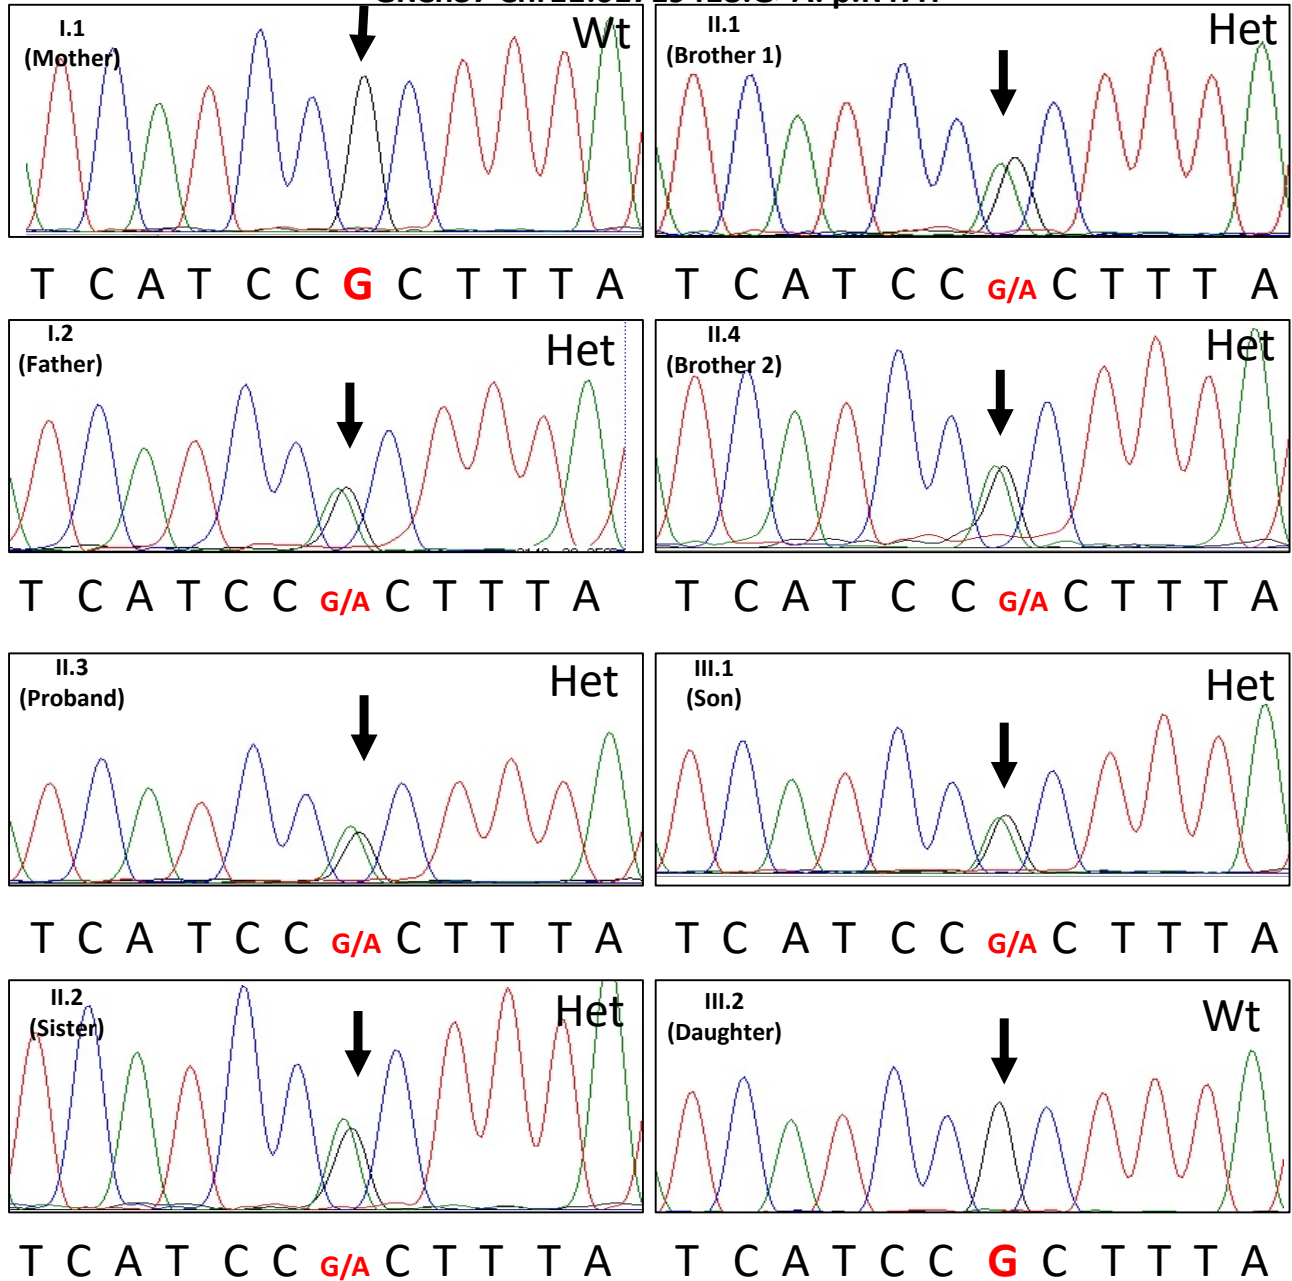



# Supplementary Figure S10

## Family C

GRCh37 Chr11:61725867:G>A; p.V216I

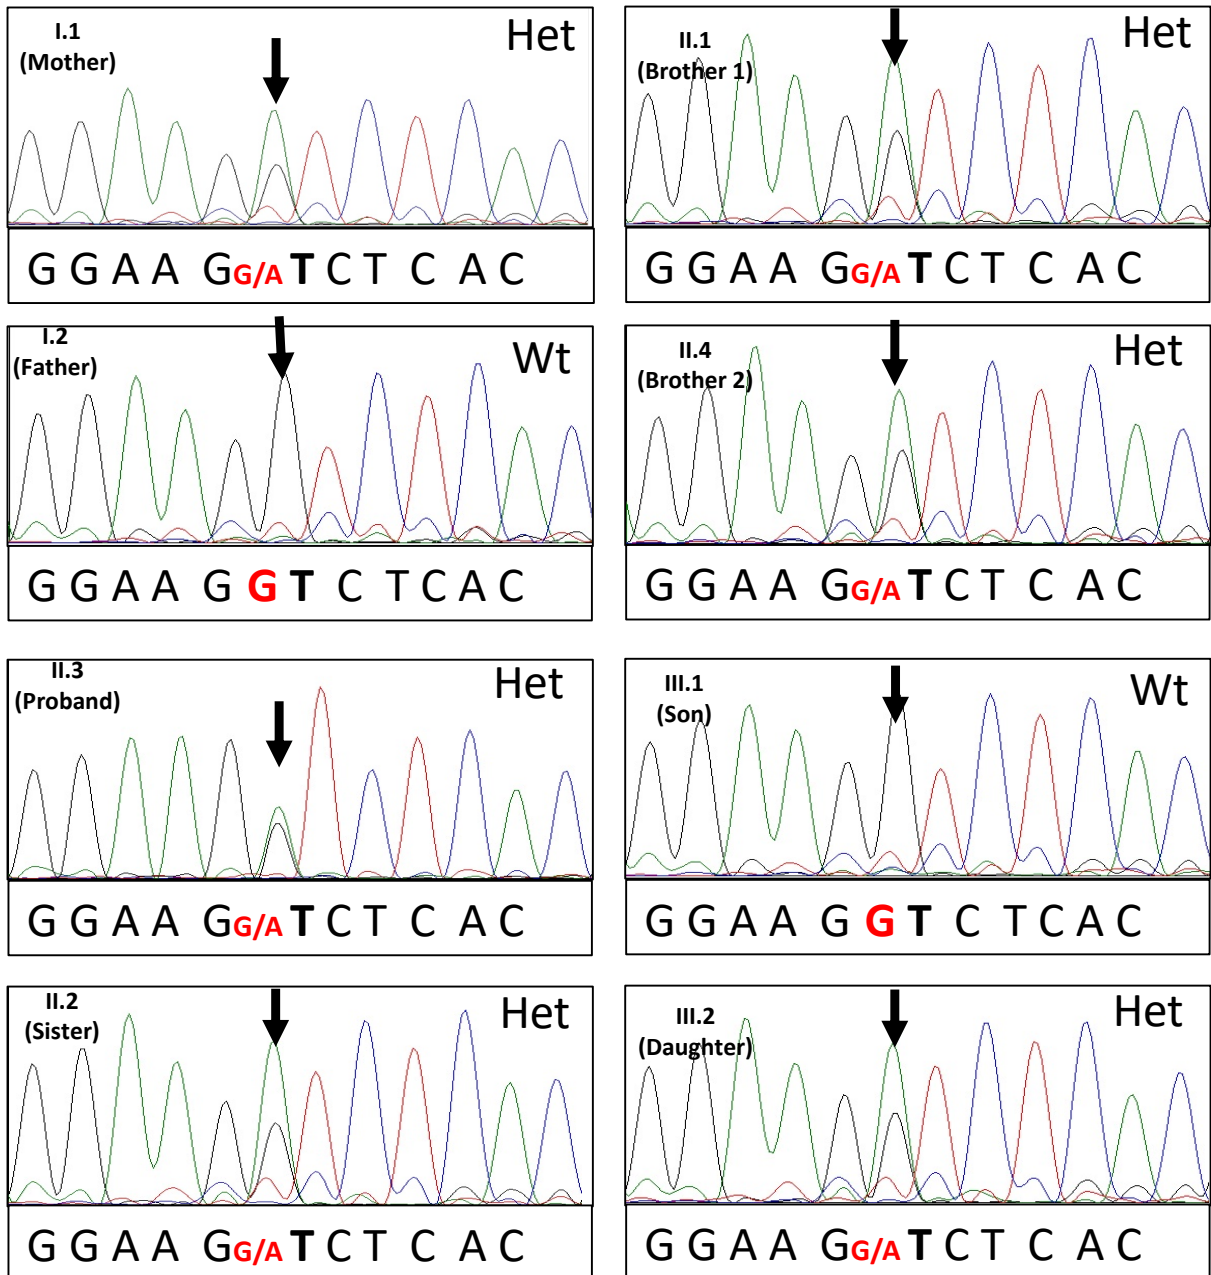

# Supplementary Figure S11

## Family D

GRCh37 Chr11: 61723214 C>T; pT91I

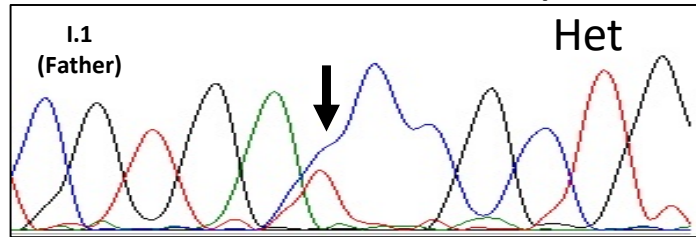

C G T G A c/T C C G C T G

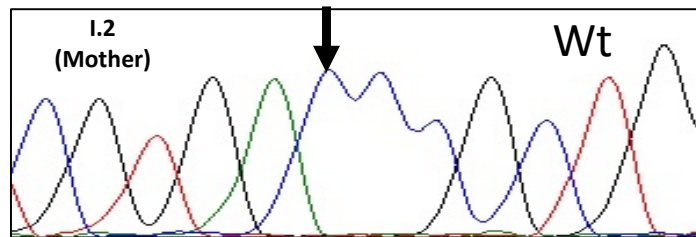

C G T G A C C C G C T G

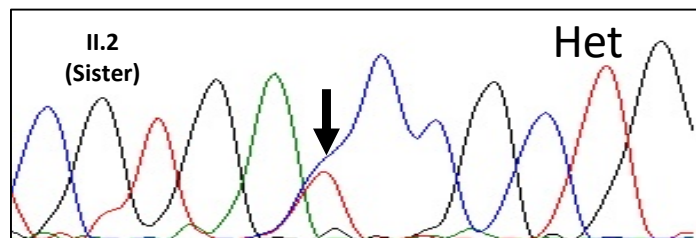

C G T G A c/T C C G C T G

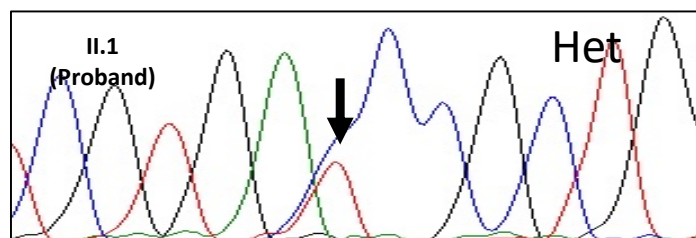

C G T G A c/T C C G C T G
